# Supplementary material
Source: PubMed Central journal article supplement (PMC5053782)
Supplement: CJN.00730116SupplementaryData.pdf [file CJN.00730116SupplementaryData.pdf]

**Supplemental Figure legends:**

Supplemental Figure 1a-e: Spline analyses of all-cause mortality by HDL-C levels in each eGFR category, where median HDL-C was used as a reference and HDL-C probability distribution histogram represented in grey bars in the background. Dashed red lines represent 95% confidence limits. Figure 3s: eGFR $\geq$ 90 ml/min.1.73m<sup>2</sup>; Figure 3b: eGFR  $\geq$ 60 to <90 ml/min.1.73m<sup>2</sup>; Figure 3c:  $\geq$ 45 to <60 ml/min.1.73m<sup>2</sup>; Figure 3d:  $\geq$ 30 to <45 ml/min.1.73m<sup>2</sup>; Figure 3e:  $\geq$ 15 to <30 ml/min.1.73m<sup>2</sup>.

Supplemental Figure 1a

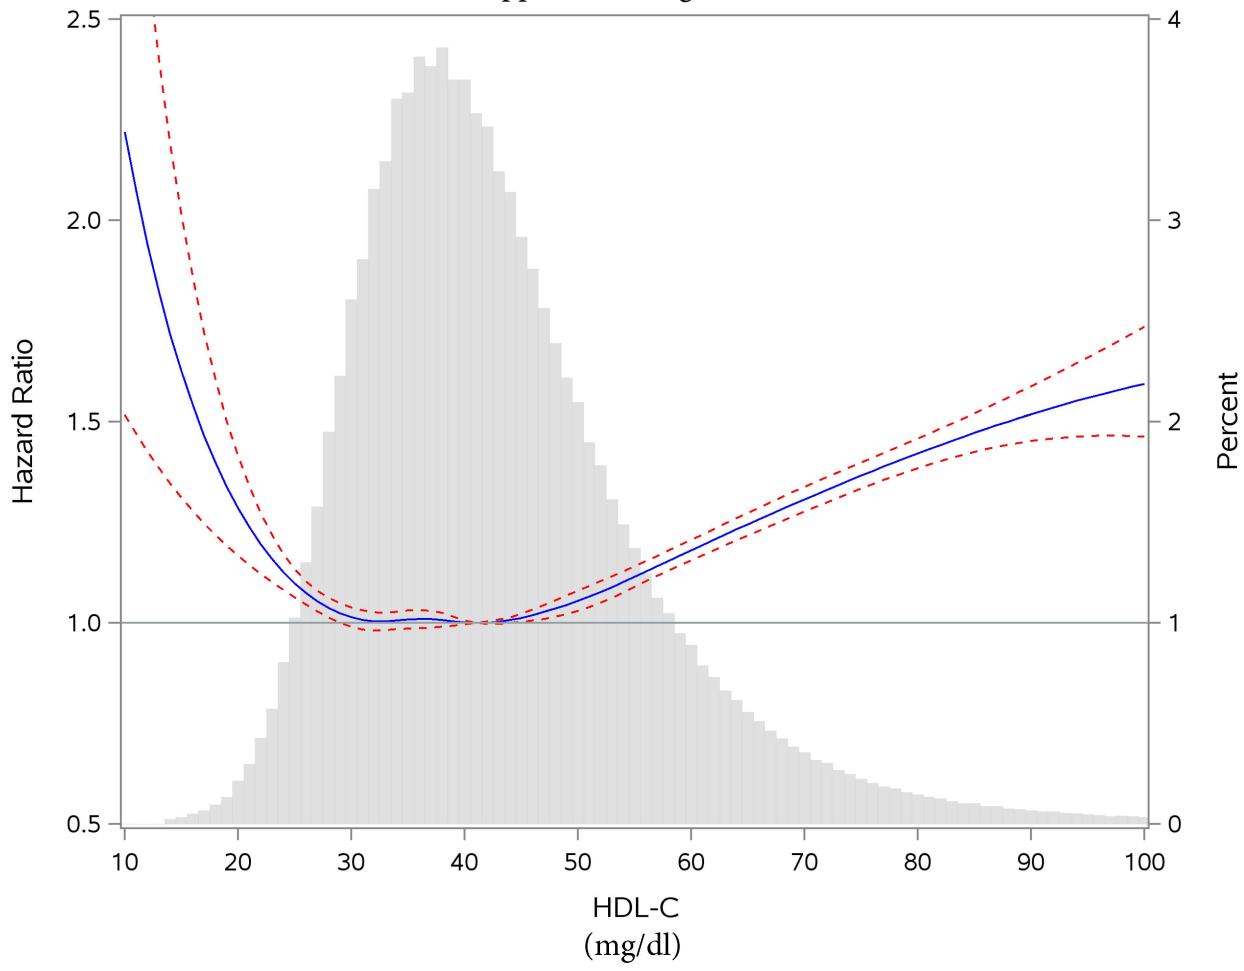

Supplemental Figure 1b

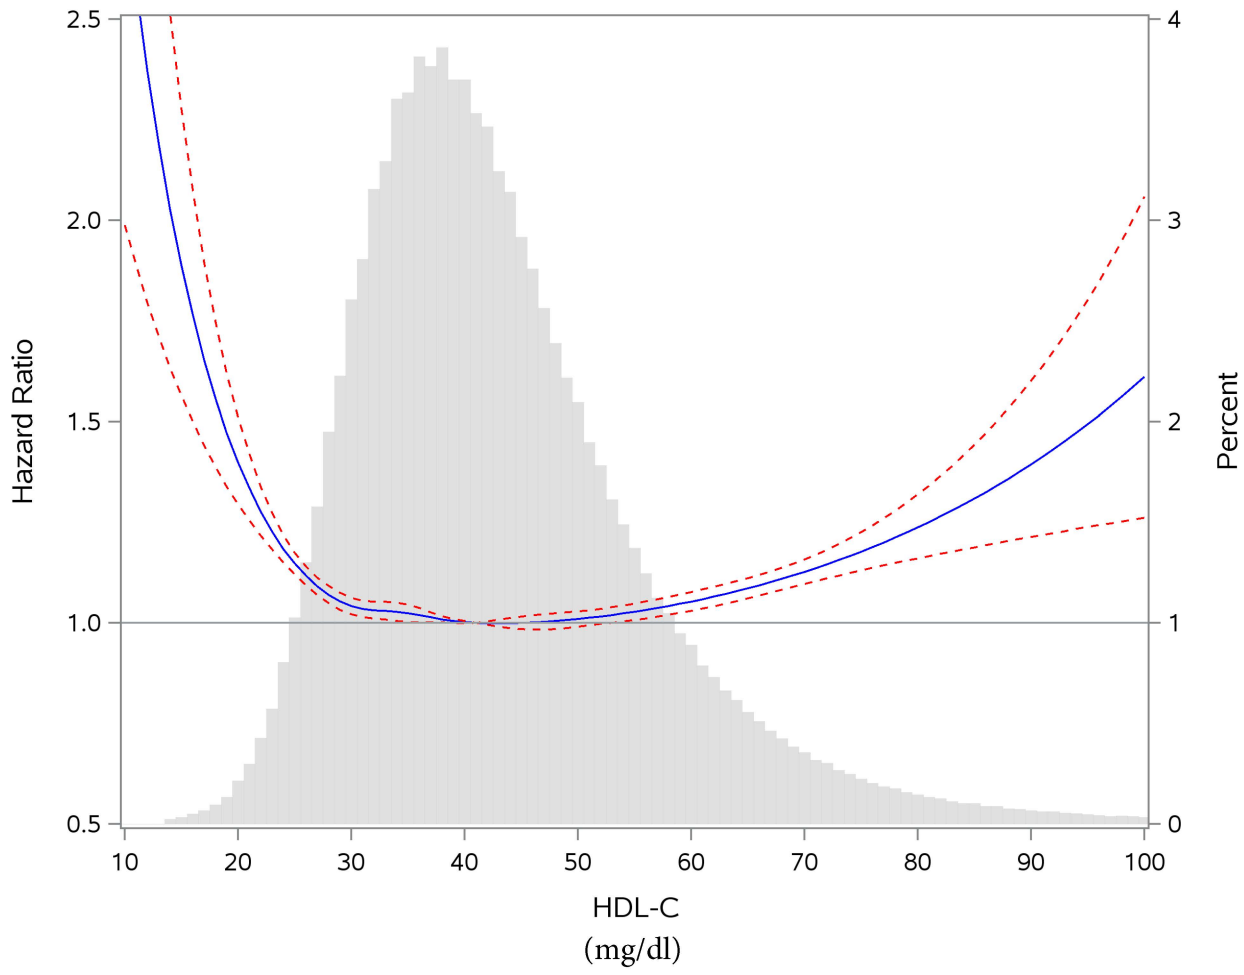

Supplemental Figure 1c

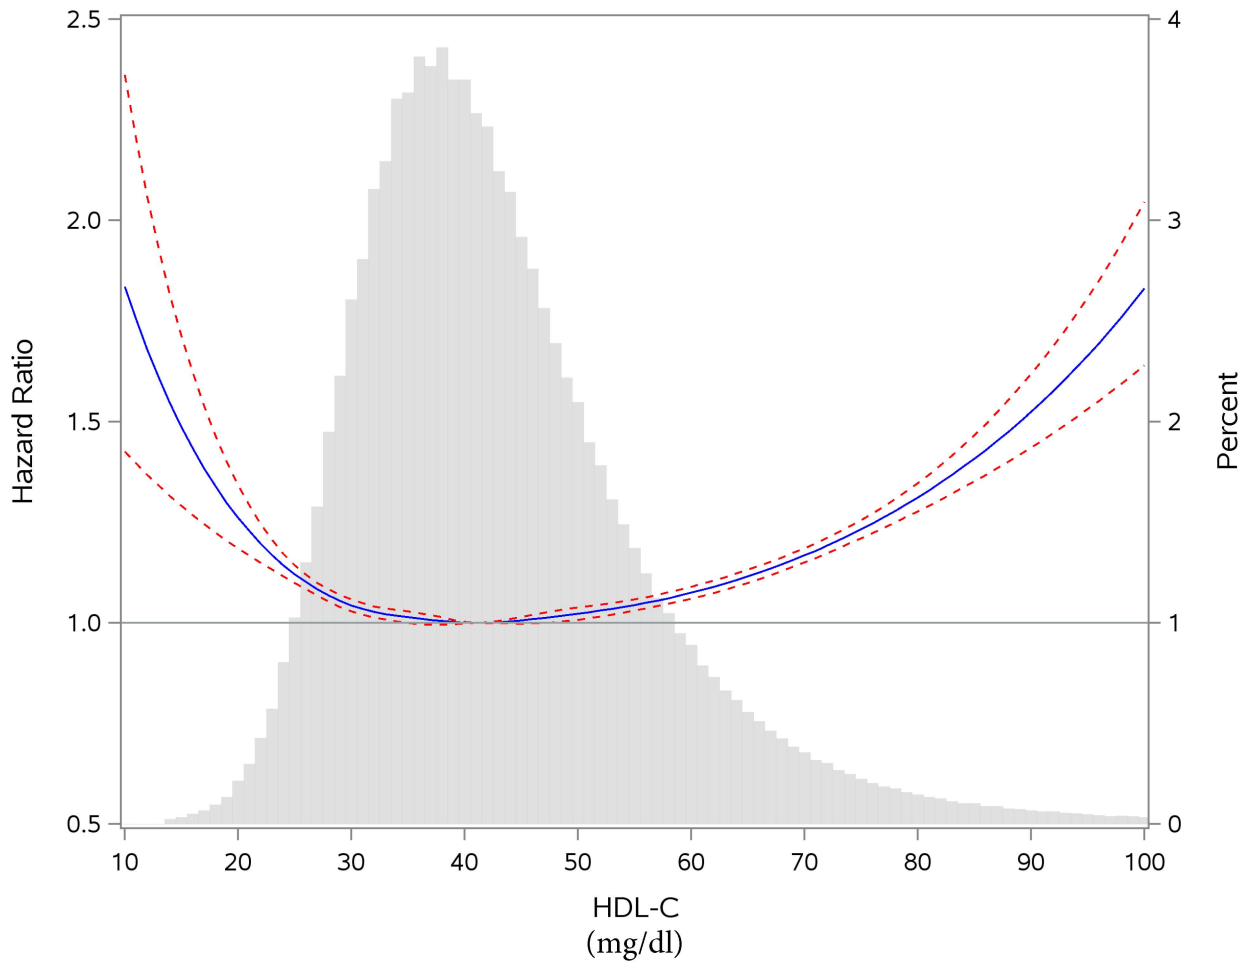

Supplemental Figure 1d

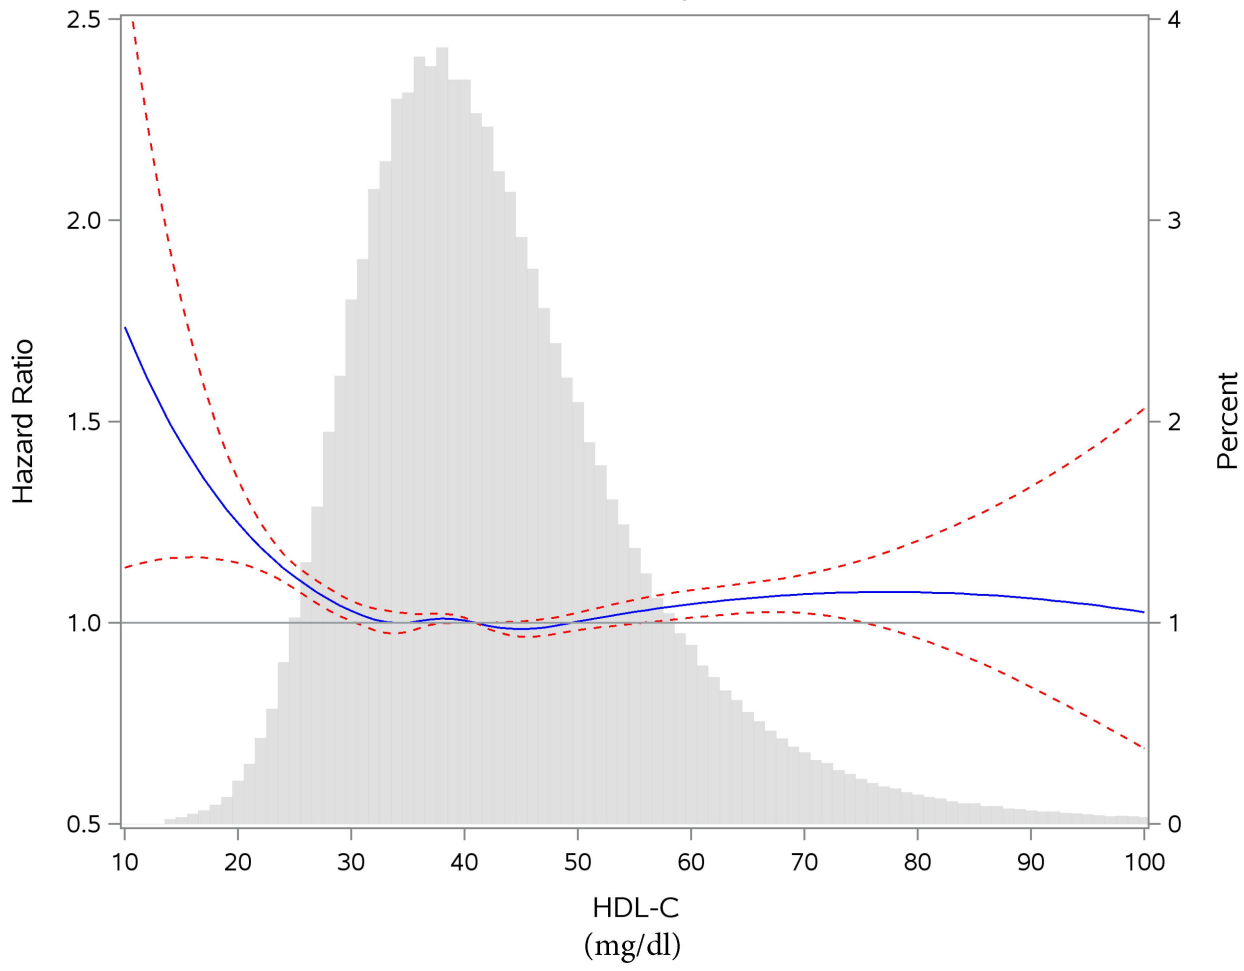

Supplemental Figure 1e

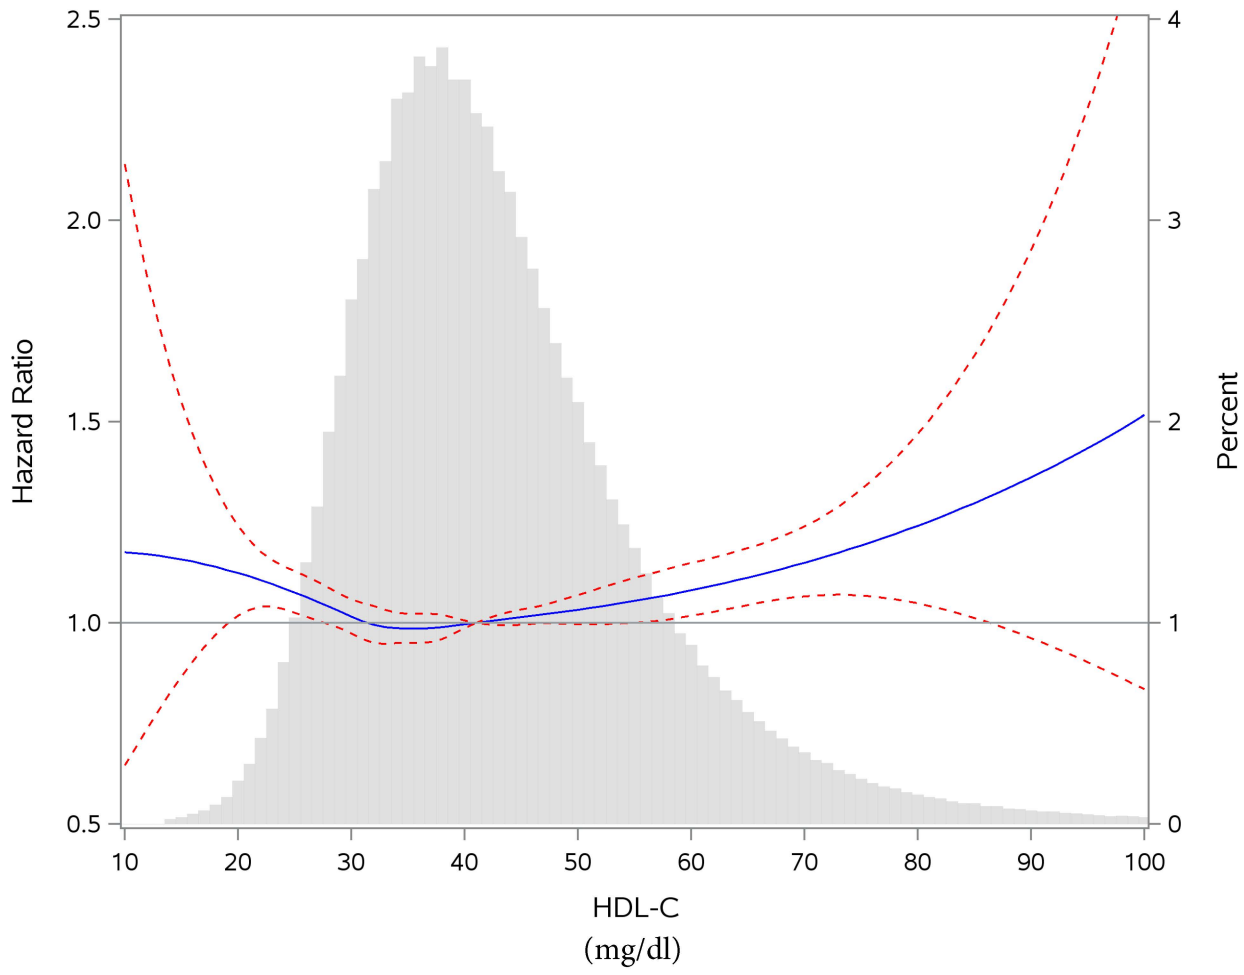

**Supplementary Tables:**

**Supplementary Table 1: Demographic and clinical characteristics in the overall cohort and according to eGFR category.**

|                              |            | Overall              | eGFR<br>≥15 to <30<br>(ml/min/1.73<br>m <sup>2</sup> ) | eGFR<br>≥30 to <45<br>(ml/min/1.7<br>3m <sup>2</sup> ) | eGFR<br>≥45 to <60<br>(ml/min/1.73<br>m <sup>2</sup> ) | eGFR<br>≥60 to <90<br>(ml/min/1.7<br>3m <sup>2</sup> ) | eGFR<br>≥90<br>(ml/min/1.<br>73m <sup>2</sup> ) |
|------------------------------|------------|----------------------|--------------------------------------------------------|--------------------------------------------------------|--------------------------------------------------------|--------------------------------------------------------|-------------------------------------------------|
| Number (%)                   |            | 1,764,986            | 25,249<br>(1.4)                                        | 98,720<br>(5.6)                                        | 272,441<br>(15.4)                                      | 954,680<br>(54.1)                                      | 413,896<br>(23.5)                               |
| Average HDL-C (IQR) (mg/dl)  |            | 43.2<br>(13.2)       | 38.9<br>(12.1)                                         | 39.9<br>(11.8)                                         | 41.7<br>(12.1)                                         | 43.3<br>(12.9)                                         | 44.8<br>(14.8)                                  |
| HDL-C Category (%) (mg/dl)   | ≤25        | 65,431<br>(3.7)      | 2,085<br>(8.3)                                         | 5,972<br>(6.1)                                         | 11,479<br>(4.2)                                        | 31,176<br>(3.3)                                        | 14,719<br>(3.6)                                 |
|                              | >25 to <34 | 338,327<br>(19.2)    | 7,150<br>(28.3)                                        | 25,157<br>(25.5)                                       | 57,977<br>(21.3)                                       | 176,095<br>(18.5)                                      | 71,948<br>(17.4)                                |
|                              | ≥34 to ≤42 | 522,373<br>(29.6)    | 7,640<br>(30.3)                                        | 31,263<br>(31.7)                                       | 85,344<br>(31.3)                                       | 283,942<br>(29.7)                                      | 114,184<br>(27.6)                               |
|                              | >42 to <50 | 399,303<br>(22.6)    | 4,462<br>(17.7)                                        | 19,746<br>(20.0)                                       | 60,612<br>(22.3)                                       | 222,440<br>(23.3)                                      | 92,043<br>(22.2)                                |
|                              | ≥50        | 439,552<br>(24.9)    | 3,912<br>(15.5)                                        | 16,582<br>(16.8)                                       | 57,029<br>(20.9)                                       | 241,027<br>(25.3)                                      | 121,002<br>(29.2)                               |
| Race (%)                     | White (%)  | 1,503,312<br>(85.2)  | 21,357<br>(84.6)                                       | 87,990<br>(89.1)                                       | 245,041<br>(89.9)                                      | 828,170<br>(86.8)                                      | 320,754<br>(77.5)                               |
|                              | Black (%)  | 224,785<br>(12.7)    | 3376<br>(13.4)                                         | 8,974<br>(9.1)                                         | 22,461<br>(8.2)                                        | 106,616<br>(11.2)                                      | 83,358<br>(20.1)                                |
|                              | Other (%)  | 36,889<br>(2.1)      | 516<br>(2.0)                                           | 1,756<br>(1.8)                                         | 4,939<br>(1.8)                                         | 19,894<br>(2.1)                                        | 9,784<br>(2.4)                                  |
| Median Age in years (IQR)    |            | 64.1<br>(56.1, 72.6) | 73.4<br>(66.8, 77.4)                                   | 74.4<br>(68.8, 77.7)                                   | 72.6<br>(65.9, 76.5)                                   | 65.2<br>(56.7, 72.1)                                   | 56.0<br>(49.6, 60.7)                            |
| Cancer (%)                   |            | 248,058<br>(14.1)    | 5,599<br>(22.2)                                        | 20,928<br>(21.2)                                       | 49,349<br>(18.1)                                       | 131,224<br>(13.8)                                      | 40,958<br>(9.9)                                 |
| Cerebrovascular Accident (%) |            | 11,633<br>(0.7)      | 494<br>(2.0)                                           | 1,417<br>(1.4)                                         | 2,610<br>(1.0)                                         | 5,446<br>(0.6)                                         | 1,666<br>(0.4)                                  |
| Coronary Artery Disease (%)  |            | 576,589<br>(32.7)    | 15,109<br>(59.8)                                       | 54,648<br>(55.4)                                       | 122,166<br>(44.8)                                      | 297,555<br>(31.2)                                      | 87,111<br>(21.1)                                |





|                                                      |            |                     |                   |                   |                   |                   |                   |
|------------------------------------------------------|------------|---------------------|-------------------|-------------------|-------------------|-------------------|-------------------|
| Statin use during follow up (%)                      |            | 1,282,527<br>(72.7) | 18,098<br>(71.7)  | 76,775<br>(77.8)  | 212,500<br>(78.0) | 706,048<br>(74.0) | 269,106<br>(65.0) |
| ACEI/ARB* medication use (%)                         |            | 876,615<br>(49.7)   | 19,845<br>(78.6)  | 74,421<br>(75.4)  | 172,066<br>(63.2) | 450,839<br>(47.2) | 159,444<br>(38.5) |
| Median Follow Up Time (IQR) (years)                  |            | 9.1<br>(7.7, 9.4)   | 4.5<br>(1.7, 8.7) | 7.5<br>(3.4, 9.2) | 9.1<br>(5.7, 9.3) | 9.2<br>(8.7, 9.4) | 9.2<br>(9.0, 9.4) |
| Death During Following Up (%)                        |            | 541,682<br>(30.7)   | 19,580<br>(77.6)  | 59,258<br>(60.0)  | 113,919<br>(41.8) | 257,093<br>(26.9) | 91,832<br>(22.2)  |
| Micro Albumin/Creatinine Ratio <sup>+</sup> (mg/g)   | 0-20 (%)   | 93,696<br>(69.8)    | 1,160<br>(43.9)   | 5,381<br>(52.8)   | 14,750<br>(63.5)  | 49,468<br>(73.1)  | 22,937<br>(75.0)  |
|                                                      | 20-300 (%) | 36,687<br>(27.3)    | 1,018<br>(38.5)   | 4,014<br>(39.4)   | 7,578<br>(32.6)   | 16,886<br>(25.0)  | 7,191<br>(23.5)   |
|                                                      | >300 (%)   | 3,938<br>(2.9)      | 465<br>(17.6)     | 804<br>(7.9)      | 914<br>(3.9)      | 1,283<br>(1.9)    | 472<br>(1.5)      |
| Average C Reactive Protein <sup>†</sup> (SD) (mg/dl) |            | 2.0<br>(4.4)        | 3.1<br>(5.7)      | 2.8<br>(5.5)      | 2.3<br>(4.8)      | 1.8<br>(4.1)      | 1.9<br>(4.1)      |

\* Angiotensin converting enzyme inhibitors (ACEI) and angiotensin receptor blockers (ARB)

+ Results for a subset of the cohort with available microalbumin/creatinine data (n=134,321)

† Results for a subset of the cohort with available C-reactive protein data (n=65,112)

**Supplementary Table 2: Nested models for risk of all-cause mortality by HDL-C levels in each eGFR category**

| eGFR<br>(ml/min/1.73m <sup>2</sup> ) | HDL-C<br>≤25<br>mg/dl | HDL-C<br>>25 to <34<br>mg/dl | HDL-C<br>≥34 to ≤42<br>mg/dl | HDL-C<br>>42 to <50<br>mg/dl | HDL-C<br>≥50<br>mg/dl |
|--------------------------------------|-----------------------|------------------------------|------------------------------|------------------------------|-----------------------|
|                                      | HR<br>(CI)            | HR<br>(CI)                   | HR<br>(CI)                   | HR<br>(CI)                   | HR<br>(CI)            |
| <b>Model 1</b>                       |                       |                              |                              |                              |                       |
| ≥15 to <30                           | 1.00                  | 0.85<br>(0.81, 0.90)         | 0.79<br>(0.75, 0.83)         | 0.81<br>(0.76, 0.86)         | 0.90<br>(0.85, 0.95)  |
| ≥30 to <45                           | 1.00                  | 0.77<br>(0.74, 0.80)         | 0.70<br>(0.67, 0.72)         | 0.67<br>(0.64, 0.69)         | 0.73<br>(0.70, 0.76)  |
| ≥45 to <60                           | 1.00                  | 0.74<br>(0.72, 0.76)         | 0.65<br>(0.64, 0.67)         | 0.62<br>(0.61, 0.64)         | 0.68<br>(0.67, 0.70)  |
| ≥60 to <90                           | 1.00                  | 0.73<br>(0.71, 0.75)         | 0.63<br>(0.62, 0.65)         | 0.61<br>(0.60, 0.62)         | 0.69<br>(0.67, 0.70)  |
| ≥90                                  | 1.00                  | 0.67<br>(0.65, 0.70)         | 0.59<br>(0.57, 0.61)         | 0.58<br>(0.56, .60)          | 0.76<br>(0.74, 0.79)  |
| <b>Model 2</b>                       |                       |                              |                              |                              |                       |
| ≥15 to <30                           | 1.00                  | 0.86<br>(0.81, 0.90)         | 0.80<br>(0.76, 0.84)         | 0.83<br>(0.79, 0.88)         | 0.92<br>(0.87, 0.98)  |
| ≥30 to <45                           | 1.00                  | 0.80<br>(0.77, 0.83)         | 0.73<br>(0.71, 0.76)         | 0.71<br>(0.68, 0.73)         | 0.78<br>(0.75, 0.81)  |
| ≥45 to <60                           | 1.00                  | 0.77<br>(0.75, 0.80)         | 0.71<br>(0.69, 0.73)         | 0.69<br>(0.67, 0.71)         | 0.76<br>(0.74, 0.79)  |
| ≥60 to <90                           | 1.00                  | 0.78<br>(0.76, 0.79)         | 0.70<br>(0.69, 0.71)         | 0.69<br>(0.68, 0.70)         | 0.78<br>(0.76, 0.80)  |
| ≥90                                  | 1.00                  | 0.74<br>(0.72, 0.77)         | 0.68<br>(0.66, 0.70)         | 0.68<br>(0.66, 0.70)         | 0.88<br>(0.85, 0.91)  |
| <b>Model 3</b>                       |                       |                              |                              |                              |                       |
| ≥15 to <30                           | 1.00                  | 0.87<br>(0.83, 0.92)         | 0.82<br>(0.78, 0.87)         | 0.84<br>(0.79, 0.89)         | 0.87<br>(0.81, 0.92)  |
| ≥30 to <45                           | 1.00                  | 0.84<br>(0.81, 0.86)         | 0.78<br>(0.75, 0.81)         | 0.74<br>(0.71, 0.77)         | 0.76<br>(0.73, 0.79)  |
| ≥45 to <60                           | 1.00                  | 0.82<br>(0.79, 0.84)         | 0.76<br>(0.74, 0.78)         | 0.73<br>(0.71, 0.75)         | 0.75<br>(0.73, 0.78)  |
| ≥60 to <90                           | 1.00                  | 0.83<br>(0.81, 0.85)         | 0.76<br>(0.74, 0.78)         | 0.74<br>(0.72, 0.76)         | 0.77<br>(0.75, 0.79)  |
| ≥90                                  | 1.00                  | 0.78<br>(0.75, 0.80)         | 0.71<br>(0.69, 0.74)         | 0.69<br>(0.66, 0.71)         | 0.76<br>(0.74, 0.79)  |
| <b>Model 4</b>                       |                       |                              |                              |                              |                       |
| ≥15 to <30                           | 1.00                  | 0.90<br>(0.85, 0.95)         | 0.86<br>(0.81, 0.91)         | 0.88<br>(0.83, 0.94)         | 0.93<br>(0.87, 0.99)  |
| ≥30 to <45                           | 1.00                  | 0.86<br>(0.83, 0.89)         | 0.82<br>(0.79, 0.85)         | 0.80<br>(0.77, 0.83)         | 0.83<br>(0.80, 0.86)  |
| ≥45 to <60                           | 1.00                  | 0.84<br>(0.81, 0.86)         | 0.80<br>(0.77, 0.82)         | 0.77<br>(0.75, 0.80)         | 0.82<br>(0.79, 0.84)  |
| ≥60 to <90                           | 1.00                  | 0.85<br>(0.83, 0.86)         | 0.79<br>(0.77, 0.81)         | 0.78<br>(0.76, 0.80)         | 0.83<br>(0.81, 0.85)  |

|                                                                                                                                                                                                                                                                                                                                                                                                                                                                                                                                                                                                                                                                                                                                                                                                      |      |                      |                      |                      |                      |
|------------------------------------------------------------------------------------------------------------------------------------------------------------------------------------------------------------------------------------------------------------------------------------------------------------------------------------------------------------------------------------------------------------------------------------------------------------------------------------------------------------------------------------------------------------------------------------------------------------------------------------------------------------------------------------------------------------------------------------------------------------------------------------------------------|------|----------------------|----------------------|----------------------|----------------------|
| <b>≥90</b>                                                                                                                                                                                                                                                                                                                                                                                                                                                                                                                                                                                                                                                                                                                                                                                           | 1.00 | 0.79<br>(0.76, 0.81) | 0.73<br>(0.71, 0.76) | 0.71<br>(0.69, 0.74) | 0.80<br>(0.78, 0.83) |
| <b>Model 5</b>                                                                                                                                                                                                                                                                                                                                                                                                                                                                                                                                                                                                                                                                                                                                                                                       |      |                      |                      |                      |                      |
| <b>≥15 to &lt;30</b>                                                                                                                                                                                                                                                                                                                                                                                                                                                                                                                                                                                                                                                                                                                                                                                 | 1.00 | 0.91<br>(0.86, 0.96) | 0.89<br>(0.84, 0.94) | 0.92<br>(0.86, 0.97) | 0.97<br>(0.91, 1.03) |
| <b>≥30 to &lt;45</b>                                                                                                                                                                                                                                                                                                                                                                                                                                                                                                                                                                                                                                                                                                                                                                                 | 1.00 | 0.88<br>(0.85, 0.91) | 0.86<br>(0.83, 0.89) | 0.84<br>(0.81, 0.87) | 0.88<br>(0.85, 0.92) |
| <b>≥45 to &lt;60</b>                                                                                                                                                                                                                                                                                                                                                                                                                                                                                                                                                                                                                                                                                                                                                                                 | 1.00 | 0.85<br>(0.83, 0.88) | 0.83<br>(0.80, 0.85) | 0.81<br>(0.79, 0.84) | 0.87<br>(0.85, 0.89) |
| <b>≥60 to &lt;90</b>                                                                                                                                                                                                                                                                                                                                                                                                                                                                                                                                                                                                                                                                                                                                                                                 | 1.00 | 0.87<br>(0.85, 0.89) | 0.83<br>(0.82, 0.85) | 0.84<br>(0.82, 0.86) | 0.91<br>(0.89, 0.93) |
| <b>≥90</b>                                                                                                                                                                                                                                                                                                                                                                                                                                                                                                                                                                                                                                                                                                                                                                                           | 1.00 | 0.85<br>(0.83, 0.88) | 0.84<br>(0.82, 0.87) | 0.85<br>(0.82, 0.88) | 1.01<br>(0.97, 1.04) |
| <p>Model 1: Demographics<sup>+</sup> and Kidney Function Parameters<sup>++</sup><br/> Model 2: Model 1 + Comorbidities*<br/> Model 3: Model 2 + Lipid Parameters<sup>†</sup>, BMI, and Statins<br/> Model 4: Model 3 + Cardiovascular Disease**<br/> Model 5: Model 4 + Serum Albumin and ACEI/ARB<br/> +Demographics include age and race<br/> ++Kidney Function Parameters include eGFR, dialysis, and kidney transplant<br/> *Comorbidities include cancer, cerebrovascular accident, chronic lung disease, dementia, diabetes, hepatitis C, HIV, and hypertension<br/> † Lipid Parameters include LDL-C and triglycerides<br/> **Coronary artery disease, congestive heart failure, and peripheral artery disease<br/> Kidney Function Parameters and statin use are treated as time varying</p> |      |                      |                      |                      |                      |

**Supplementary Table 3: Effect modification of risk of death by HDL-C levels and eGFR category:**

| eGFR<br>(ml/min/1.73m <sup>2</sup> ) | HDL-C<br>≤25<br>(mg/dl) | HDL-C<br>>25 to <34<br>(mg/dl) | HDL-C<br>≥34 to ≤42<br>(mg/dl) | HDL-C<br>>42 to <50<br>(mg/dl) | HDL-C<br>≥50<br>(mg/dl) |
|--------------------------------------|-------------------------|--------------------------------|--------------------------------|--------------------------------|-------------------------|
|                                      | HR<br>(CI)              | HR<br>(CI)                     | HR<br>(CI)                     | HR<br>(CI)                     | HR<br>(CI)              |
| <b>≥15 to &lt;30</b>                 | 1.00                    | 0.91*<br>(0.86, 0.96)          | 0.88*<br>(0.84, 0.93)          | 0.92*<br>(0.87, 0.97)          | 0.98<br>(0.92, 1.04)    |
| <b>≥30 to &lt;45</b>                 | 1.00                    | 0.90*<br>(0.87, 0.93)          | 0.89*<br>(0.86, 0.92)          | 0.87*<br>(0.84, 0.90)          | 0.91<br>(0.87, 0.94)    |
| <b>≥45 to &lt;60</b>                 | 1.00                    | 0.87*<br>(0.84, 0.89)          | 0.84*<br>(0.82, 0.87)          | 0.83*<br>(0.81, 0.86)          | 0.88*<br>(0.86, 0.91)   |
| <b>≥60 to &lt;90</b>                 | 1.00                    | 0.87*<br>(0.85, 0.89)          | 0.84*<br>(0.82, 0.86)          | 0.84*<br>(0.83, 0.86)          | 0.92<br>(0.90, 0.94)    |
| <b>≥90</b>                           | 1.00                    | 0.81<br>(0.78, 0.84)           | 0.78<br>(0.75, 0.81)           | 0.78<br>(0.76, 0.81)           | 0.94<br>(0.91, 0.97)    |

Models adjusted for age, race, cancer, cerebrovascular accident, chronic lung disease, diabetes mellitus, dementia, hepatitis C, HIV, hypertension, BMI, LDL-C, triglycerides, serum albumin, ACEI/ARB use, coronary artery disease, congestive heart failure, and peripheral artery disease. Models additionally adjust for eGFR, dialysis, kidney transplant, and statin use as time varying

\*Bold: indicates a significant (<0.05) p-value for interaction between HDL-C level and eGFR category, with the reference eGFR category being eGFR≥90 ml/min.1.73m<sup>2</sup>

**Supplementary Table 4a: Effect modification of the relationship between HDL-C and risk of death by presence of congestive heart failure**

| eGFR<br>(ml/min/1.73m <sup>2</sup> ) | Congestive<br>Heart<br>Failure | HDL-C<br>≤25<br>(mg/dl) | HDL-C<br>>25 to<br><34<br>(mg/dl) | HDL-C<br>≥34 to<br>≤42<br>(mg/dl) | HDL-C<br>>42 to<br><50<br>(mg/dl) | HDL-C<br>≥50<br>(mg/dl)  |
|--------------------------------------|--------------------------------|-------------------------|-----------------------------------|-----------------------------------|-----------------------------------|--------------------------|
|                                      |                                | HR<br>(CI)              | HR<br>(CI)                        | HR<br>(CI)                        | HR<br>(CI)                        | HR<br>(CI)               |
| ≥15 to <30                           | No                             | 1.00                    | 0.92<br>(0.86,<br>0.99)           | 0.89<br>(0.83,<br>0.96)           | 0.94<br>(0.87,<br>1.02)           | 0.97<br>(0.89,<br>1.05)  |
|                                      | Yes                            | 1.00                    | 0.89<br>(0.83,<br>0.97)           | 0.89<br>(0.82,<br>0.96)           | 0.88<br>(0.80,<br>0.96)           | 0.98<br>(0.89,<br>1.08)  |
| ≥30 to <45                           | No                             | 1.00                    | 0.90<br>(0.86,<br>0.94)           | 0.87<br>(0.83,<br>0.91)           | 0.85<br>(0.81,<br>0.89)           | 0.90<br>(0.86,<br>0.95)  |
|                                      | Yes                            | 1.00                    | 0.85<br>(0.81,<br>0.90)           | 0.84<br>(0.79,<br>0.88)           | 0.82<br>(0.77,<br>0.87)           | 0.84<br>(0.79,<br>0.90)  |
| ≥45 to <60                           | No                             | 1.00                    | 0.86<br>(0.83,<br>0.89)           | 0.83<br>(0.80,<br>0.86)           | 0.82<br>(0.79,<br>0.85)           | 0.87<br>(0.84,<br>0.90)  |
|                                      | Yes                            | 1.00                    | 0.84<br>(0.79,<br>0.88)           | 0.83<br>(0.79,<br>0.87)           | 0.79<br>(0.75,<br>0.84)           | 0.86<br>(0.81,<br>0.91)  |
| ≥60 to <90                           | No                             | 1.00                    | 0.86<br>(0.84,<br>0.88)           | 0.82<br>(0.80,<br>0.84)           | 0.82<br>(0.80,<br>0.84)           | 0.89<br>(0.87,<br>0.91)  |
|                                      | Yes                            | 1.00                    | 0.89<br>(0.85,<br>0.93)           | 0.88*<br>(0.84,<br>0.92)          | 0.91*<br>(0.86,<br>0.95)          | 1.00*<br>(0.95,<br>1.05) |
| ≥90                                  | No                             | 1.00                    | 0.84<br>(0.81,<br>0.87)           | 0.82<br>(0.79,<br>0.85)           | 0.83<br>(0.80,<br>0.86)           | 0.99<br>(0.95,<br>1.02)  |
|                                      | Yes                            | 1.00                    | 0.97*<br>(0.88,<br>1.07)          | 0.98*<br>(0.90,<br>1.08)          | 1.00*<br>(0.91,<br>1.10)          | 1.13*<br>(1.02,<br>1.24) |

Models adjusted for age, race, cancer, cerebrovascular accident, chronic lung disease, diabetes mellitus, dementia, hepatitis C, HIV, hypertension, BMI, LDL-C, triglycerides, serum albumin, ACEI/ARB use, coronary artery disease, congestive heart failure, and peripheral artery disease. Models additionally adjust for eGFR, dialysis, kidney transplant, and statin use as time varying  
 \*Bold: indicates a significant (<0.05) p-value for interaction between HDL-C level and Congestive Heart Failure status.

**Supplementary Table 4b: Effect modification of relationship between HDL-C and risk of death by cardiovascular disease**

| eGFR<br>(ml/min/1.73m <sup>2</sup> ) | Cardiovascular<br>Disease <sup>+</sup> | HDL-C<br>≤25<br>(mg/dl) | HDL-C<br>>25 to<br><34<br>(mg/dl) | HDL-C<br>≥34 to<br>≤42<br>(mg/dl) | HDL-C<br>>42 to<br><50<br>(mg/dl) | HDL-C<br>≥50<br>(mg/dl)  |
|--------------------------------------|----------------------------------------|-------------------------|-----------------------------------|-----------------------------------|-----------------------------------|--------------------------|
|                                      |                                        | HR<br>(CI)              | HR<br>(CI)                        | HR<br>(CI)                        | HR<br>(CI)                        | HR<br>(CI)               |
| ≥15 to <30                           | Neither<br>CAD or CHF                  | 1.00                    | 0.94<br>(0.84,<br>1.06)           | 0.95<br>(0.84,<br>1.06)           | 1.01<br>(0.90,<br>1.14)           | 1.02<br>(0.90,<br>1.15)  |
|                                      | Either<br>CAD or CHF                   | 1.00                    | 0.91<br>(0.83,<br>0.99)           | 0.85<br>(0.78,<br>0.93)           | 0.88<br>(0.80,<br>0.97)           | 0.92<br>(0.84,<br>1.02)  |
|                                      | Both<br>CAD and CHF                    | 1.00                    | 0.90<br>(0.83,<br>0.98)           | 0.90<br>(0.81,<br>0.97)           | 0.89<br>(0.80,<br>0.98)           | 1.02<br>(0.92,<br>1.13)  |
| ≥30 to <45                           | Neither<br>CAD or CHF                  | 1.00                    | 0.85<br>(0.79,<br>0.91)           | 0.83<br>(0.78,<br>0.89)           | 0.81<br>(0.76,<br>0.87)           | 0.86<br>(0.80,<br>0.92)  |
|                                      | Either<br>CAD or CHF                   | 1.00                    | 0.91<br>(0.86,<br>0.96)           | 0.88<br>(0.83,<br>0.93)           | 0.87<br>(0.82,<br>0.92)           | 0.94<br>(0.88,<br>0.99)  |
|                                      | Both<br>CAD and CHF                    | 1.00                    | 0.86<br>(0.82,<br>0.92)           | 0.85<br>(0.80,<br>0.90)           | 0.82<br>(0.77,<br>0.88)           | 0.83<br>(0.78,<br>0.90)  |
| ≥45 to <60                           | Neither<br>CAD or CHF                  | 1.00                    | 0.84<br>(0.80,<br>0.88)           | 0.81<br>(0.77,<br>0.85)           | 0.81<br>(0.77,<br>0.85)           | 0.85<br>(0.81,<br>0.89)  |
|                                      | Either<br>CAD or CHF                   | 1.00                    | 0.87<br>(0.83,<br>0.91)           | 0.84<br>(0.81,<br>0.88)           | 0.83<br>(0.79,<br>0.87)           | 0.89<br>(0.85,<br>0.93)  |
|                                      | Both<br>CAD and CHF                    | 1.00                    | 0.84<br>(0.79,<br>0.89)           | 0.83<br>(0.78,<br>0.87)           | 0.78<br>(0.74,<br>0.83)           | 0.85<br>(0.80,<br>0.91)  |
| ≥60 to <90                           | Neither<br>CAD or CHF                  | 1.00                    | 0.84<br>(0.81,<br>0.87)           | 0.80<br>(0.78,<br>0.82)           | 0.80<br>(0.78,<br>0.83)           | 0.87<br>(0.85,<br>0.90)  |
|                                      | Either<br>CAD or CHF                   | 1.00                    | 0.90*<br>(0.86,<br>0.93)          | 0.85*<br>(0.83,<br>0.89)          | 0.86*<br>(0.83,<br>0.89)          | 0.93*<br>(0.90,<br>0.97) |
|                                      | Both<br>CAD and CHF                    | 1.00                    | 0.88<br>(0.83,<br>0.93)           | 0.87*<br>(0.83,<br>0.92)          | 0.89*<br>(0.84,<br>0.93)          | 0.95*<br>(0.90,<br>1.00) |

|            |                       |      |                          |                          |                          |                          |
|------------|-----------------------|------|--------------------------|--------------------------|--------------------------|--------------------------|
| <b>≥90</b> | Neither<br>CAD or CHF | 1.00 | 0.81<br>(0.78,<br>0.85)  | 0.80<br>(0.76,<br>0.83)  | 0.80<br>(0.76,<br>0.83)  | 0.96<br>(0.92,<br>1.00)  |
|            | Either<br>CAD or CHF  | 1.00 | 0.90*<br>(0.85,<br>0.96) | 0.90*<br>(0.84,<br>0.95) | 0.93*<br>(0.87,<br>0.99) | 1.07*<br>(1.01,<br>1.14) |
|            | Both<br>CAD and CHF   | 1.00 | 0.99*<br>(0.88,<br>1.10) | 1.00*<br>(0.90,<br>1.11) | 0.97*<br>(0.87,<br>1.09) | 1.10*<br>(0.99,<br>1.22) |

Models adjusted for age, race, cancer, cerebrovascular accident, chronic lung disease, diabetes mellitus, dementia, hepatitis C, HIV, hypertension, BMI, LDL-C, triglycerides, serum albumin, ACEI/ARB use, cardiovascular disease<sup>+</sup>, and peripheral artery disease. Models additionally adjust for eGFR, dialysis, kidney transplant, and statin use as time varying

+Defined as having neither coronary artery disease (CAD) or congestive heart failure (CHF), either CAD alone or CHF alone, or both CAD and CHF

\*Bold: indicates a significant (<0.05) p-value for interaction between HDL-C level and cardiovascular disease status

**Supplementary Table 5: Risk of all-cause mortality by HDL-C levels in Women (n=82,442)**

| eGFR<br>(ml/min/1.73m <sup>2</sup> )                                                                                                                                                                                                                                                                                                                                                                                                                                                                        | HDL-C<br>≤25<br>mg/dl | HDL-C<br>>25 to <34<br>mg/dl | HDL-C<br>≥34 to ≤42<br>mg/dl | HDL-C<br>>42 to <50<br>mg/dl | HDL-C<br>≥50<br>mg/dl |
|-------------------------------------------------------------------------------------------------------------------------------------------------------------------------------------------------------------------------------------------------------------------------------------------------------------------------------------------------------------------------------------------------------------------------------------------------------------------------------------------------------------|-----------------------|------------------------------|------------------------------|------------------------------|-----------------------|
|                                                                                                                                                                                                                                                                                                                                                                                                                                                                                                             | HR<br>(CI)            | HR<br>(CI)                   | HR<br>(CI)                   | HR<br>(CI)                   | HR<br>(CI)            |
| <b>Model 1</b>                                                                                                                                                                                                                                                                                                                                                                                                                                                                                              |                       |                              |                              |                              |                       |
| ≥15 to <60                                                                                                                                                                                                                                                                                                                                                                                                                                                                                                  | 1.00                  | 0.82<br>(0.58, 1.17)         | 0.72<br>(0.51, 1.06)         | 0.61<br>(0.43, 0.85)         | 0.57<br>(0.41, 0.80)  |
| ≥60 to <90                                                                                                                                                                                                                                                                                                                                                                                                                                                                                                  | 1.00                  | 0.61<br>(0.44, 0.84)         | 0.49<br>(0.36, 0.67)         | 0.40<br>(0.30, 0.55)         | 0.36<br>(0.27, 0.49)  |
| ≥90                                                                                                                                                                                                                                                                                                                                                                                                                                                                                                         | 1.00                  | 0.53<br>(0.38, 0.74)         | 0.40<br>(0.29, 0.56)         | 0.33<br>(0.24, 0.45)         | 0.34<br>(0.25, 0.46)  |
| <b>Model 2</b>                                                                                                                                                                                                                                                                                                                                                                                                                                                                                              |                       |                              |                              |                              |                       |
| ≥15 to <60                                                                                                                                                                                                                                                                                                                                                                                                                                                                                                  | 1.00                  | 0.86<br>(0.60, 1.22)         | 0.77<br>(0.54, 1.08)         | 0.68<br>(0.48, 0.95)         | 0.67<br>(0.48, 0.94)  |
| ≥60 to <90                                                                                                                                                                                                                                                                                                                                                                                                                                                                                                  | 1.00                  | 0.66<br>(0.48, 0.92)         | 0.58<br>(0.42, 0.79)         | 0.49<br>(0.36, 0.67)         | 0.47<br>(0.35, 0.64)  |
| ≥90                                                                                                                                                                                                                                                                                                                                                                                                                                                                                                         | 1.00                  | 0.72<br>(0.51, 1.03)         | 0.60<br>(0.43, 0.83)         | 0.51<br>(0.36, 0.71)         | 0.56<br>(0.40, 0.78)  |
| <b>Model 3</b>                                                                                                                                                                                                                                                                                                                                                                                                                                                                                              |                       |                              |                              |                              |                       |
| ≥15 to <60                                                                                                                                                                                                                                                                                                                                                                                                                                                                                                  | 1.00                  | 0.91<br>(0.64, 1.30)         | 0.86<br>(0.61, 1.22)         | 0.75<br>(0.53, 1.06)         | 0.70<br>(0.49, 0.98)  |
| ≥60 to <90                                                                                                                                                                                                                                                                                                                                                                                                                                                                                                  | 1.00                  | 0.72<br>(0.52, 0.99)         | 0.65<br>(0.48, 0.88)         | 0.55<br>(0.40, 0.75)         | 0.51<br>(0.37, 0.69)  |
| ≥90                                                                                                                                                                                                                                                                                                                                                                                                                                                                                                         | 1.00                  | 0.83<br>(0.58, 1.19)         | 0.69<br>(0.49, 0.98)         | 0.60<br>(0.42, 0.85)         | 0.60<br>(0.43, 0.85)  |
| <b>Model 4</b>                                                                                                                                                                                                                                                                                                                                                                                                                                                                                              |                       |                              |                              |                              |                       |
| ≥15 to <60                                                                                                                                                                                                                                                                                                                                                                                                                                                                                                  | 1.00                  | 0.93<br>(0.65, 1.32)         | 0.91<br>(0.64, 1.28)         | 0.81<br>(0.57, 1.15)         | 0.77<br>(0.54, 1.09)  |
| ≥60 to <90                                                                                                                                                                                                                                                                                                                                                                                                                                                                                                  | 1.00                  | 0.75<br>(0.54, 1.03)         | 0.67<br>(0.49, 0.91)         | 0.58<br>(0.42, 0.79)         | 0.54<br>(0.40, 0.73)  |
| ≥90                                                                                                                                                                                                                                                                                                                                                                                                                                                                                                         | 1.00                  | 0.97<br>(0.67, 1.41)         | 0.84<br>(0.58, 1.20)         | 0.71<br>(0.50, 1.02)         | 0.73<br>(0.51, 1.04)  |
| <b>Model 5</b>                                                                                                                                                                                                                                                                                                                                                                                                                                                                                              |                       |                              |                              |                              |                       |
| ≥15 to <60                                                                                                                                                                                                                                                                                                                                                                                                                                                                                                  | 1.00                  | 0.94<br>(0.66, 1.35)         | 0.93<br>(0.66, 1.31)         | 0.85<br>(0.60, 1.20)         | 0.81<br>(0.57, 1.15)  |
| ≥60 to <90                                                                                                                                                                                                                                                                                                                                                                                                                                                                                                  | 1.00                  | 0.76<br>(0.55, 1.04)         | 0.68<br>(0.50, 0.93)         | 0.60<br>(0.44, 0.82)         | 0.57<br>(0.42, 0.77)  |
| ≥90                                                                                                                                                                                                                                                                                                                                                                                                                                                                                                         | 1.00                  | 0.93<br>(0.65, 1.33)         | 0.84<br>(0.60, 1.19)         | 0.74<br>(0.52, 1.05)         | 0.79<br>(0.56, 1.12)  |
| Model 1: Demographics <sup>+</sup> and Kidney Function Parameters <sup>++</sup><br>Model 2: Model 1 + Comorbidities*<br>Model 3: Model 2 + Lipid Parameters <sup>†</sup> , BMI, and Statins<br>Model 4: Model 3 + Cardiovascular Disease**<br>Model 5: Model 4 + Serum Albumin and ACEI/ARB<br>+Demographics include age and race<br>++Kidney Function Parameters include eGFR, dialysis, and kidney transplant<br>*Comorbidities include cancer, cerebrovascular accident, chronic lung disease, dementia, |                       |                              |                              |                              |                       |



diabetes, hepatitis C, HIV, and hypertension

† Lipid Parameters include LDL-C and triglycerides

\*\*Coronary artery disease, congestive heart failure, and peripheral artery disease

Kidney Function Parameters and statin use are treated as time varying

**Supplementary Table 6: Risk of all-cause mortality by HDL-C level in a subcohort where data on microalbuminuria is available (N=134,321).**

| eGFR<br>(ml/min/1.73m <sup>2</sup> ) | HDL-C<br>≤25<br>mg/dl | HDL-C<br>>25 to <34<br>mg/dl | HDL-C<br>≥34 to ≤42<br>mg/dl | HDL-C<br>>42 to <50<br>mg/dl | HDL-C<br>≥50<br>mg/dl |
|--------------------------------------|-----------------------|------------------------------|------------------------------|------------------------------|-----------------------|
|                                      | HR<br>(CI)            | HR<br>(CI)                   | HR<br>(CI)                   | HR<br>(CI)                   | HR<br>(CI)            |
| <b>Model 1</b>                       |                       |                              |                              |                              |                       |
| ≥15 to <60                           | 1.00                  | 0.77<br>(0.73, 0.82)         | 0.68<br>(0.64, 0.72)         | 0.65<br>(0.62, 0.70)         | 0.71<br>(0.67, 0.76)  |
| ≥60 to <90                           | 1.00                  | 0.78<br>(0.73, 0.83)         | 0.67<br>(0.63, 0.72)         | 0.64<br>(0.60, 0.69)         | 0.73<br>(0.68, 0.78)  |
| ≥90                                  | 1.00                  | 0.69<br>(0.62, 0.77)         | 0.62<br>(0.56, 0.69)         | 0.62<br>(0.56, 0.69)         | 0.77<br>(0.69, 0.85)  |
| <b>Model 2</b>                       |                       |                              |                              |                              |                       |
| ≥15 to <60                           | 1.00                  | 0.79<br>(0.75, 0.84)         | 0.71<br>(0.67, 0.76)         | 0.69<br>(0.65, 0.73)         | 0.75<br>(0.70, 0.80)  |
| ≥60 to <90                           | 1.00                  | 0.80<br>(0.74, 0.85)         | 0.71<br>(0.66, 0.76)         | 0.68<br>(0.64, 0.73)         | 0.78<br>(0.73, 0.83)  |
| ≥90                                  | 1.00                  | 0.73<br>(0.66, 0.82)         | 0.68<br>(0.62, 0.76)         | 0.69<br>(0.62, 0.77)         | 0.85<br>(0.76, 0.95)  |
| <b>Model 3</b>                       |                       |                              |                              |                              |                       |
| ≥15 to <60                           | 1.00                  | 0.84<br>(0.79, 0.89)         | 0.77<br>(0.72, 0.81)         | 0.75<br>(0.70, 0.80)         | 0.76<br>(0.71, 0.81)  |
| ≥60 to <90                           | 1.00                  | 0.85<br>(0.79, 0.91)         | 0.77<br>(0.72, 0.82)         | 0.74<br>(0.69, 0.79)         | 0.80<br>(0.74, 0.86)  |
| ≥90                                  | 1.00                  | 0.77<br>(0.69, 0.86)         | 0.73<br>(0.65, 0.81)         | 0.72<br>(0.64, 0.80)         | 0.79<br>(0.71, 0.89)  |
| <b>Model 4</b>                       |                       |                              |                              |                              |                       |
| ≥15 to <60                           | 1.00                  | 0.87<br>(0.82, 0.93)         | 0.83<br>(0.78, 0.88)         | 0.83<br>(0.77, 0.88)         | 0.86<br>(0.80, 0.92)  |
| ≥60 to <90                           | 1.00                  | 0.87<br>(0.81, 0.93)         | 0.81<br>(0.76, 0.87)         | 0.79<br>(0.74, 0.85)         | 0.88<br>(0.82, 0.94)  |
| ≥90                                  | 1.00                  | 0.78<br>(0.70, 0.87)         | 0.75<br>(0.68, 0.84)         | 0.75<br>(0.67, 0.84)         | 0.84<br>(0.75, 0.94)  |
| <b>Model 5</b>                       |                       |                              |                              |                              |                       |
| ≥15 to <60                           | 1.00                  | 0.91<br>(0.86, 0.96)         | 0.89<br>(0.84, 0.95)         | 0.90<br>(0.85, 0.96)         | 0.95<br>(0.89, 1.02)  |
| ≥60 to <90                           | 1.00                  | 0.90<br>(0.84, 0.96)         | 0.87<br>(0.82, 0.93)         | 0.88<br>(0.82, 0.94)         | 0.99<br>(0.92, 1.06)  |
| ≥90                                  | 1.00                  | 0.85<br>(0.76, 0.94)         | 0.85<br>(0.77, 0.95)         | 0.88<br>(0.79, 0.99)         | 1.02<br>(0.91, 1.14)  |
| <b>Model 6</b>                       |                       |                              |                              |                              |                       |
| ≥15 to <60                           | 1.00                  | 0.91<br>(0.86, 0.96)         | 0.89<br>(0.84, 0.95)         | 0.90<br>(0.85, 0.96)         | 0.95<br>(0.89, 1.02)  |
| ≥60 to <90                           | 1.00                  | 0.89<br>(0.84, 0.96)         | 0.87<br>(0.81, 0.93)         | 0.88<br>(0.82, 0.94)         | 0.98<br>(0.91, 1.05)  |
| ≥90                                  | 1.00                  | 0.84<br>(0.76, 0.94)         | 0.85<br>(0.76, 0.95)         | 0.88<br>(0.78, 0.98)         | 1.01<br>(0.90, 1.13)  |

Model 1: Demographics<sup>+</sup> and Kidney Function Parameters<sup>++</sup>

Model 2: Model 1 + Comorbidities<sup>\*</sup>

Model 3: Model 2 + Lipid Parameters<sup>†</sup>, BMI, and Statins

Model 4: Model 3 + Cardiovascular Disease<sup>\*\*</sup>

Model 5: Model 4 + Serum Albumin and ACEI/ARB

Model 6: Model 5 + Microalbumin/Creatinine Ratio

+Demographics include age and race

++Kidney Function Parameters include eGFR, dialysis, and kidney transplant

\*Comorbidities include cancer, cerebrovascular accident, chronic lung disease, dementia, diabetes, hepatitis C, HIV, and hypertension

† Lipid Parameters include LDL-C and triglycerides

\*\*Coronary artery disease, congestive heart failure, and peripheral artery disease

Kidney Function Parameters and statin use are treated as time varying

**Supplementary Table 7: Risk of all-cause mortality by HDL-C level in a subcohort while additionally controlling for body surface area**

| eGFR<br>(ml/min/1.73m <sup>2</sup> ) | HDL-C<br>≤25<br>(mg/dl) | HDL-C<br>>25 to <34<br>(mg/dl) | HDL-C<br>≥34 to ≤42<br>(mg/dl) | HDL-C<br>>42 to <50<br>(mg/dl) | HDL-C<br>≥50<br>(mg/dl) |
|--------------------------------------|-------------------------|--------------------------------|--------------------------------|--------------------------------|-------------------------|
|                                      | HR<br>(CI)              | HR<br>(CI)                     | HR<br>(CI)                     | HR<br>(CI)                     | HR<br>(CI)              |
| <b>≥15 to &lt;30</b>                 | 1.00                    | 0.91<br>(0.86, 0.96)           | 0.89<br>(0.84, 0.94)           | 0.91<br>(0.86, 0.97)           | 0.97<br>(0.91, 1.03)    |
| <b>≥30 to &lt;45</b>                 | 1.00                    | 0.88<br>(0.85, 0.91)           | 0.86<br>(0.83, 0.89)           | 0.84<br>(0.81, 0.87)           | 0.88<br>(0.85, 0.91)    |
| <b>≥45 to &lt;60</b>                 | 1.00                    | 0.85<br>(0.83, 0.88)           | 0.83<br>(0.80, 0.85)           | 0.81<br>(0.79, 0.84)           | 0.87<br>(0.84, 0.89)    |
| <b>≥60 to &lt;90</b>                 | 1.00                    | 0.87<br>(0.85, 0.89)           | 0.83<br>(0.82, 0.85)           | 0.84<br>(0.82, 0.86)           | 0.91<br>(0.89, 0.93)    |
| <b>≥90</b>                           | 1.00                    | 0.86<br>(0.83, 0.89)           | 0.84<br>(0.82, 0.87)           | 0.85<br>(0.82, 0.88)           | 1.00<br>(0.97, 1.04)    |

Models adjusted for age, race, cancer, cerebrovascular accident, chronic lung disease, diabetes mellitus, dementia, hepatitis C, HIV, hypertension, BMI, LDL-C, triglycerides, serum albumin, ACEI/ARB use, coronary artery disease, congestive heart failure, peripheral artery disease, and body surface area. Models additionally adjust for eGFR, dialysis, kidney transplant, and statin use as time varying covariates

**Supplementary Table 8: Risk of all-cause mortality by HDL-C level in a subcohort where data on C Reactive protein is available (N=65,112).**

| eGFR<br>(ml/min/1.73m <sup>2</sup> ) | HDL-C<br>≤25<br>(mg/dl) | HDL-C<br>>25 to <34<br>(mg/dl) | HDL-C<br>≥34 to ≤42<br>(mg/dl) | HDL-C<br>>42 to <50<br>(mg/dl) | HDL-C<br>≥50<br>(mg/dl) |
|--------------------------------------|-------------------------|--------------------------------|--------------------------------|--------------------------------|-------------------------|
|                                      | HR<br>(CI)              | HR<br>(CI)                     | HR<br>(CI)                     | HR<br>(CI)                     | HR<br>(CI)              |
| <b>≥15 to &lt;30</b>                 | 1.00                    | 0.75<br>(0.67, 1.02)           | 0.89<br>(0.72, 1.11)           | 0.95<br>(0.75, 1.20)           | 1.08<br>(0.85, 1.37)    |
| <b>≥30 to &lt;45</b>                 | 1.00                    | 0.93<br>(0.79, 1.09)           | 0.94<br>(0.80, 1.10)           | 0.92<br>(0.78, 1.10)           | 0.88<br>(0.74, 1.06)    |
| <b>≥45 to &lt;60</b>                 | 1.00                    | 0.91<br>(0.80, 1.03)           | 0.82<br>(0.72, 0.93)           | 0.76<br>(0.67, 0.87)           | 0.87<br>(0.76, 1.00)    |
| <b>≥60 to &lt;90</b>                 | 1.00                    | 0.85<br>(0.77, 0.94)           | 0.82<br>(0.74, 0.90)           | 0.79<br>(0.72, 0.88)           | 0.86<br>(0.78, 0.95)    |
| <b>≥90</b>                           | 1.00                    | 0.83<br>(0.72, 0.95)           | 0.79<br>(0.69, 0.90)           | 0.77<br>(0.67, 0.89)           | 0.87<br>(0.77, 0.99)    |

Models adjusted for age, race, cancer, cerebrovascular accident, chronic lung disease, diabetes mellitus, dementia, hepatitis C, HIV, hypertension, BMI, LDL-C, triglycerides, serum albumin, ACEI/ARB use, coronary artery disease, congestive heart failure, peripheral artery disease, and body surface area. Models additionally adjust for eGFR, dialysis, kidney transplant, and statin use as time varying covariates
